# Supplementary material
Source: Springer Nature journal article supplement (https://www.springermedizin.de/resource/supplementary/12985_2009_623_MOESM4_ESM.pdf/9608128)
Supplement: MOESM4 [file 9608128]

A

### The Effect of NH<sub>4</sub>Cl on HPV16 Reporter-virions

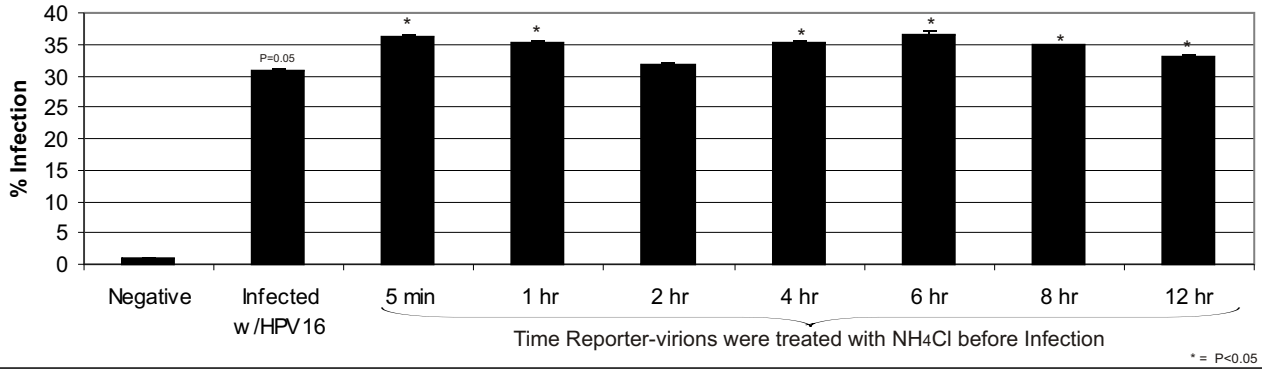

\*
